# Supplementary material
Source: PubMed Central journal article supplement (PMC3732930)
Supplement: 1303906110_pnas.201303906SI.pdf [file 1303906110_pnas.201303906SI.pdf]

# Supporting Information

Meckes et al. 10.1073/pnas.1303906110

**Table S1. Pathways predicted to be activated by EBV exosomes and by Kaposi sarcoma-associated virus (KSHV) and EBV\_KSHV exosomes**

| Upstream regulator                                                      | Molecular type             | Activation z-score | <i>P</i> value overlap | No. of molecules in dataset |
|-------------------------------------------------------------------------|----------------------------|--------------------|------------------------|-----------------------------|
| <b>Pathways predicted to be activated by EBV exosomes</b>               |                            |                    |                        |                             |
| Tumor protein 53                                                        | Transcriptional regulation | 2.842              | 5.47E-27               | 80                          |
| IFN- $\gamma$                                                           | Cytokine                   | 2.208              | 1.06E-14               | 57                          |
| TNF                                                                     | Cytokine                   | 2.659              | 2.1E-09                | 57                          |
| CD40LG                                                                  | Cytokine                   | 2.284              | 9.58E-09               | 25                          |
| Structural maintenance of chromosome 3 (SMC3)                           | Other                      | 2                  | 4.00E-07               | 4                           |
| Epstein-Barr virus induced gene 3 (EBI3)                                | Cytokine                   | 2.779              | 5.42E-07               | 8                           |
| Double-strand-break repair protein rad21 homolog (RAD21)                | Cytokine                   | 2                  | 2.73E-06               | 4                           |
| IL-27                                                                   | Transcriptional regulation | 2.66               | 4.39E-06               | 10                          |
| Interferon alpha 2                                                      | Transcriptional regulation | 2.289              | 5.03E-06               | 15                          |
| JUN                                                                     | Kinase                     | 2.115              | 1.66E-05               | 19                          |
| Class II, major histocompatibility complex, transactivator (CIITA)      | Group                      | 2.223              | 2.04E-05               | 6                           |
| Janus kinase 1 (JAK1)                                                   | Group                      | 2.383              | 2.88E-05               | 6                           |
| Interferon alpha (INFA)                                                 | Transcriptional regulation | 2.354              | 3.45E-05               | 17                          |
| Interferon                                                              | Group                      | 2.727              | 5.10E-05               | 9                           |
| CD2                                                                     | Transcriptional regulation | 2.425              | 5.35E-05               | 6                           |
| Gastrin (GAST)                                                          | Other                      | 2.63               | 1.66E-04               | 7                           |
| Beta-2 microglobulin (B2M)                                              | transmembrane receptor     | 2                  | 7.74E-04               | 4                           |
| Fms-related tyrosine kinase 3 ligand (FLT3LG)                           | Cytokine                   | 2.219              | 9.52E-04               | 5                           |
| V-Rel reticuloendotheliosis viral oncogene homolog A (RELA)             | Transcriptional regulation | 2.738              | 1.06E-03               | 14                          |
| IL-8                                                                    | Cytokine                   | 2.169              | 3.22E-03               | 5                           |
| NFKB1                                                                   | Transcriptional regulation | 2.213              | 3.67E-03               | 10                          |
| Insulin receptor (INSR)                                                 | Kinase                     | 2.433              | 4.03E-03               | 13                          |
| SAM pointed domain-containing Ets transcription factor (SPDEF)          | Transcriptional regulation | 2                  | 5.92E-03               | 5                           |
| Aryl hydrocarbon receptor nuclear translocator 2 (ARNT2)                | Transcriptional regulation | 2.138              | 2.40E-02               | 8                           |
| Single-minded homolog 1 (SIM1)                                          | Transcriptional regulation | 2.138              | 2.79E-02               | 8                           |
| Myeloid differentiation primary response gene 88 (MYD88)                | Other                      | 2.428              | 3.21E-03               | 8                           |
| Microphthalmia-associated transcription factor (MITF)                   | Transcriptional regulation | 2.433              | 4.17E-02               | 6                           |
| Interferon beta 1                                                       | Cytokine                   | 2.021              | 5.91E-02               | 8                           |
| Interferon regulatory factor 7                                          | Transcriptional regulation | 2.238              | 6.52E-02               | 5                           |
| Mitogen-activated protein kinase (MAPK)                                 | Group                      | 2                  | 8.78E-02               | 4                           |
| Tol-like receptor (TLR)                                                 | Group                      | 2                  | 9.54E-02               | 4                           |
| Leptin (LEP)                                                            | Growth factor              | 2.103              | 9.62E-02               | 10                          |
| Inhibin alpha (INHA)                                                    | Growth factor              | 2                  | 9.80E-02               | 4                           |
| Tumor necrosis factor (ligand) superfamily, member 11 (TNFSF11)         | Cytokine                   | 2.189              | 9.91E-02               | 7                           |
| Colony stimulating factor 2 (CSF2)                                      | Cytokine                   | 2.415              | 1.83E-01               | 7                           |
| <b>Pathways predicted to be activated by KSHV and EBV_KSHV exosomes</b> |                            |                    |                        |                             |
| Mitogen activated protein kinase 1 (MAPK1)                              | Kinase                     | 2.010              | 9.11E-04               | 14                          |
| PI3K (family)                                                           | Group                      | 2.00               | 2.00E-03               | 4                           |
| Let-7                                                                   | MicroRNA                   | 2.219              | 1.21E-02               | 6                           |
| Growth factor independent 1 transcription repressor (GF1)               | Transcriptional regulation | 2.236              | 1.48E-02               | 5                           |
| Cyclin-dependent kinase inhibitor 1B (CDKN1B)                           | Kinase                     | 2.00               | 3.56E-02               | 5                           |

## Other Supporting Information Files

[Dataset S1 \(XLSX\)](#)

[Dataset S2 \(XLSX\)](#)

[Dataset S3 \(XLSX\)](#)
